# Supplementary material for: Valence makes a stronger contribution than arousal to affective priming
Source: PeerJ. 2019 Oct 1;7:e7777. doi: 10.7717/peerj.7777 (PMC6777477; doi:10.7717/peerj.7777)
Supplement: Data S1 — The sheet 1 indicates the respose times of Experiment 1, the sheet 2 indicates the response times of Experiment 2 and the sheet 3 indicates the response times of Experiment 3. [file peerj-07-7777-s001.xlsx]

## Sheet: Experiment 1
PL-PL	PL-NL	PH-PH	PH-NH	NL-NL	NL-PL	NH-NH	NH-PH	PL-pseudoword	PH-pseudoword	NL-pseudoword	NH-pseudoword
516.56	528.21	452.23	514.34	578.49	566.63	560.52	534.51	608.61	588.21	601.78	608.62
530.05	643.92	508.86	557.64	589.89	546.65	536.79	516.57	618.21	617.24	652.39	644.57
528.01	587.88	516.38	567.17	577.54	561.26	675.26	642.83	662.73	652.74	663.24	644.22
539.84	626.55	625.18	664.09	570.89	561.59	492.78	495.94	634.1	650.42	633.45	633.61
529.63	525.91	529.95	578.88	567.98	550.56	584.54	565.61	616.05	593.58	604.09	593.13
527.77	551.5	503.88	574.27	563.68	554.64	551.39	532.37	610.95	596.71	616.42	622.8
483.13	515.7	519.56	567.9	558.19	554.61	606.15	598.11	611.23	592.21	584.57	615.85
523.44	558.1	541.08	580.91	587.06	570.33	664.89	626.11	586.37	615.58	590.41	593.33
522.26	657.63	513.39	563.76	579.96	566.61	681.37	653.36	683.18	698.85	690.69	593.48
536.26	539.8	498.45	502.86	585.56	576.71	556.49	533.99	618.3	598.47	619.65	622.29
506.59	559.18	582.12	640.89	536.85	539.28	547.95	558.42	597.17	602.25	648.9	619.39
512.51	558.57	430.33	496.72	557.12	548.86	558.56	556.81	580.03	594.45	611.77	614.22
626.53	594.3	546.07	620.76	570.83	557.97	671.61	653.54	691.91	709.49	684.13	680.74
588.94	623.97	611.15	695.07	585.6	570.5	605.65	585.38	623.75	629.78	607.64	590.93
571.22	587.32	515.84	565.72	562.57	545.05	519.38	495.78	605.96	591.02	609.24	624.23
542.36	552.73	502.37	543.12	585.55	555.73	641.27	592.14	669.53	680.34	682.68	650.06
502.89	516.12	520	583.99	566.05	550.47	540.57	524.9	594.13	603.85	589.1	637.53
558.37	580.59	606.44	654.89	573.64	557.71	596.95	585.69	645.88	624.67	613.98	583
586.61	616.85	524.36	584.23	556.54	546.64	574.22	591.23	633.81	627.51	667.85	640.58
578.44	583.06	546.22	596.33	605.44	594.7	602.16	574.11	633.56	637.58	628.76	581.96
506.68	518.92	489.22	559.28	562.14	549.32	599.34	563.74	608.57	603.53	641.36	622.18
568.94	608.97	541.23	598.11	579.38	560.11	586.37	560.39	631.28	628.87	645.79	688.93
526.34	579.36	514.78	574.96	581.63	561.23	579.45	554.31	597.15	609.71	613.86	637.93
546.21	574.22	532.44	601.45	587.33	577.25	590.11	557.46	633.77	629.78	634.83	589.61
554.98	589.14	546.11	587.49	571.82	553.22	597.32	561.33	592.85	612.32	602.67	581.04
509.55	562.75	499.57	554.71	560.14	542.33	579.64	562.36	619.1	603.02	599.85	615.11
543.74	563.12	539.23	573.42	562.11	548.14	582.55	570.65	622.22	629.44	626.93	637.81
561.56	584.89	554.66	586.11	575.34	564.22	587.13	571.33	618.45	617.47	611.77	623.24
540.33	574.62	528.97	581.75	572.83	558.3	588.23	568.53	623.173	622.825	627.779	621.085

## Sheet: Experiment 2
PL-PL	PL-PH	PH-PH	PH-PL	NL-NL	NL-NH	NH-NH	NH-NL	PL-pseudoword	PH-pseudoword	NL-pseudoword	NH-pseudoword
533.55	567.78	534.33	526.45	564.3	571.48	622.7	559	587.25	649.5	644.6	647.59
748.85	832.1	649.2	682.03	730.88	825.33	731.63	718.33	751.54	650.48	638.53	658.72
526.5	564.7	541.48	535.98	538.9	563.58	534.18	572.28	551.01	600.9	639.46	615.37
563.18	571.08	564.43	585.23	607.55	642.22	575.3	643.88	586.85	580.55	642.01	584.52
444.5	499.58	468.33	549.25	495.13	425.18	540.88	501.28	524.46	585.33	647.41	584.36
528.65	519.05	491.88	513.48	587.68	543.58	524.93	525.3	557.25	606.31	607.78	637.21
468.75	468.35	439.05	481.28	495.3	513.73	493.65	496.03	526.13	599.14	567.3	594.88
495.33	520.97	511.3	559.53	504.13	517.6	552.58	538.8	566.06	614.09	592.06	645.8
646.97	738.55	716.38	887.93	675.53	694.03	763.28	826.88	802.39	646	638.92	625.26
547.13	588.73	542.35	548.9	573.28	591.35	541.33	546.18	607.6	625.74	600.32	649.01
586.65	548.6	502.4	548.7	563.68	601.58	533.88	557.7	590.74	634.01	582.46	613.2
472.7	536.48	454.73	470.63	500.38	510.05	486.18	488.47	549.16	597.37	579.89	580.51
604.08	633.13	628.33	588.8	636.68	670.8	629.18	629.35	669.56	654.92	581.8	640.13
524.05	529.8	503.2	533.9	544.22	535.18	500.6	530.2	603.92	637.67	627.16	634.1
490.38	520.78	584.73	617.4	514.58	529.9	569.9	590.53	615.12	635.51	642.25	643.41
522.18	492.48	464.95	466.68	495.25	496.03	492.43	490.65	561.52	600.95	644.4	590.62
605.7	631.3	590.18	608.23	622.18	674.95	636.08	694.05	685.12	636.28	646.81	682.89
467.68	492.85	465.8	511.75	504.33	525.13	549.28	554.58	563.12	585.87	654.29	647.16
798.63	799.15	731.63	753.65	822.35	877.22	762.75	802.22	779.38	647.43	634.34	681.9
611.53	622.28	593.83	736.78	751.65	662.68	622.1	643.95	695.12	608.38	611.37	695.16
651.22	692.78	608.28	712.03	737.38	677.63	675.75	800.8	791.24	704.15	733.43	730.89
570.95	627.2	584.58	593.48	645.08	610.22	600.13	699.78	684.78	635.63	613.04	627.51
533.97	610.85	549.8	609.98	632.2	599.98	566.38	595.18	622.57	655.43	650.22	612.51
508.88	568.43	434.6	448.4	547.38	532.68	498.78	476.1	594.73	596.02	607.74	601.37
534.43	534.03	487.97	572.35	553.93	559.3	527.47	571.45	599.65	595.86	595.53	584.81
517.2	541.7	561.45	528.9	507.5	513	525.6	527.4	604.33	653.85	627.34	582.35
482.75	474	457.95	484.45	497.88	495.03	474.23	485.18	504.84	521.46	519.7	533.3
510.93	539.1	468.33	518.18	579.72	549.97	509	549.45	590.78	600.35	604.73	611.47
526.73	600.45	508.38	496.83	616.43	554.72	566.53	530.78	617.89	620.28	613.35	623.71
483.08	493.23	472.65	503.63	511.47	486.13	507.43	479.48	531.15	554.36	567.16	577.04
684.08	621.15	555.8	713.2	677.33	709.4	641.88	620.35	720.39	682.06	695.95	681.43
555.25	580.43	537.8	578.72	589	589.6	571.11	589.55	620.505	619.867	621.011	626.393

## Sheet: Experiment 3
PL-PL	PL-Neu	PH-PH	PH-Neu	NL-NL	NL-Neu	NH-NH	NH-Neu	PL-pseudoword	PH-pseudoword	NL-pseudoword	NH-pseudoword
516.56	578.83	452.23	468.47	578.49	569.23	560.52	547.95	598.57	583.16	599.48	601.54
530.05	509.85	508.86	528.81	589.89	577.94	536.79	542.62	588.55	583.65	605.88	651.51
528.01	546.47	516.38	549.6	577.54	551.47	675.26	628.81	647.91	596.61	617.69	610.74
539.84	504.87	625.18	624.14	570.89	559.16	492.78	502.78	627.52	627.74	637.37	651.63
529.63	549.05	509.95	526.41	567.98	545.07	584.54	567.9	611.76	601.21	594.38	610.07
527.77	549.06	503.88	544.92	563.68	572.81	551.39	538.07	631.56	621.34	605.25	651.03
483.13	587.33	519.56	551.84	558.19	553.28	606.15	578.93	613.01	645.86	597.73	626.6
523.44	581.49	541.08	554.42	587.06	582.63	664.89	633.07	626.97	650.18	634.47	637.22
522.26	566.88	513.39	530.05	579.96	520.6	681.37	644.49	624.74	618.89	621.14	639.97
536.26	481.61	498.45	501.7	585.56	530.78	586.49	564.78	626.89	650.97	625.06	643.44
506.59	516.93	562.12	589.74	576.85	597.97	567.95	551.51	613.89	626.79	628.75	616.5
512.51	542.52	430.33	452.92	587.12	559.16	588.56	569.48	598.1	616.53	630.88	588.76
526.53	539.1	546.07	594.12	570.83	574.53	671.61	657.3	641.86	650.73	652.24	651.22
588.94	569.87	611.15	631.61	585.6	520.6	605.65	573.29	623.52	623.4	621.53	630.94
571.22	513.74	515.84	541.76	562.57	554.23	519.38	509.13	603.02	611.21	606.16	591.31
542.36	629.05	502.37	528.91	585.55	577.94	641.27	580.64	635.5	614.39	627	621.48
502.89	513.46	520	548.7	586.05	556.69	580.57	533.74	622.74	634.44	618.37	616.19
558.37	485.26	606.45	624.15	573.64	495.78	596.95	593.01	610.36	601.41	622.56	628.92
556.61	566.88	524.36	550.13	556.54	572.97	594.22	591.22	598.9	604.01	593.79	607
518.44	571.51	546.22	576.31	605.44	559.16	602.16	571.35	605.46	614.04	629.84	621.5
506.68	551.61	489.22	560.37	562.14	556.71	599.34	573.14	617.64	654.12	602.15	633.03
568.94	536.93	541.23	538.11	579.38	547.06	586.37	561.22	617.65	588.79	594.58	654.44
526.34	552.14	514.78	560.73	581.63	564.22	579.45	571.41	642.06	622.75	638.84	623.1
546.21	553.44	532.44	561.46	587.33	569.31	590.11	575.02	642.01	593.18	640.45	647.03
554.98	546.37	546.11	550.09	571.82	554.25	597.32	568.29	615.23	610.82	618.17	623.05
509.55	542.11	499.57	551.9	560.14	560.09	579.64	574.87	633.73	622.42	591.76	613.42
543.74	544.77	539.23	546.26	562.11	552.47	582.55	569.44	610.59	599.62	597.19	599.54
531.11	552.33	536.44	563.74	588.11	553.21	601.44	586.32	630.46	643.01	635.84	630.61
561.56	546.79	554.66	549.07	575.34	553.04	587.13	574.76	636.04	647.33	635.99	614.81
512.22	523.74	489.31	512.33	588.55	541.23	613.74	596.37	633.39	638.46	655.7	636.03
532.76	545.13	526.56	550.42	576.87	556.12	594.19	574.36	620.988	619.902	619.341	625.754
