# Supplementary material for: Valence makes a stronger contribution than arousal to affective priming
Source: PeerJ. 2019 Oct 1;7:e7777. doi: 10.7717/peerj.7777 (PMC6777477; doi:10.7717/peerj.7777)
Supplement: Supplemental Information 1 — This file provides the mean ratings for valence, arousal, concreteness, and so on for each word. PH=positive high-arousal words, NH=negative high-arousal words, PL=positive low-arousal words, NL=negative low-arousal words, neu= neutral words. [file peerj-07-7777-s002.xlsx]

## Sheet: Sheet1
	Meterial	English translations	Valence	Arousal	Concreteness	Frequency	Strokes
PH	烟花	fireworks	6.60976	6.63415	6.41463	2.45	17
PH	礼物	gift	7.06667	6.86667	6.33333	21.19	13
PH	笑容	smile	7.26667	6.96667	6.83333	17.11	20
PH	珠宝	jem	7.16667	6.63333	6.9	5.7	18
PH	彩虹	rainbow	6.83333	6.41667	6.71	5.7	20
PH	奖章	honor badge	7.21951	6.7561	6.09756	12.22	20
PH	花园	garden	6.93333	7.13333	7.1	23.63	14
PH	美食	cuisine	7.93333	7.3	7.13333	0.81	18
PH	情侣	lovers	7.33333	6.66667	6.66667	3.26	19
PH	金牌	gold medal	7.3	7.06667	6.23333	22.82	20
PH	亲人	relatives	7.93333	7.53333	7.3	32.6	11
PH	海洋	ocean	7.00082	6.51389	6.58333	59.49	19
PH	夕阳	sunset	7.06667	6.93333	6.6	8.96	9
PH	阳光	sunlight	7.77273	7.18182	7.81818	54.6	12
PH	母亲	mother	8.6	8.13333	8.26667	162.16	14
PH	前途	future	7.4	7.06667	2.86667	44.0039	19
PH	年轻	young	7	6.73333	2.96667	210.241	15
PH	赞赏	praise	7.33333	6.96667	3.06667	26.8913	28
PH	激情	passion	7.1	7.26667	3.13333	15.4829	27
PH	新奇	novelty	6.61111	6.38889	3.26444	4.8893	21
PH	精彩	spectacular	7.4	7	3.96667	17.9275	25
PH	奇迹	miracle	6.92593	6.71429	4.25	31.7806	17
PH	信任	trust	6.96429	6.42857	4.32143	1.6298	15
PH	赞叹	in awe	7.30556	6.80556	4.47222	7.334	21
PH	期待	expect	7.1	6.56667	4.8	29.3359	21
PH	勇敢	brave	7.61111	6.75	4.91667	28.521	20
PH	奋斗	work hard for	7.77273	6.77273	3.90909	94.5269	12
PH	愿望	wish	6.71487	6.37092	4.3732	56.2272	25
PH	母爱	motherly love	8.40909	8.40909	4.09091	2.4447	15
PH	惊喜	nice surprise	7.28431	6.60049	4.39869	8.9638	23
NH	地震	earth quake	1.98	8.17	7.53333	97.79	21
NH	歹徒	gangster	2.12	6.65	6.63636	62.75	14
NH	洪灾	floods	2.13	6.52	6.66667	1.63	16
NH	毒蛇	poisonous snake	2.17	7.16	7.22727	3.26	20
NH	棺材	coffin	2.19	6.88	6.93333	25.26	19
NH	叛徒	traitor	2.25	6.75	6.58333	1.63	19
NH	血迹	blood stain	2.28	7.45	6.2	3.26	15
NH	病人	sickman	2.29	6.37	7.63636	76.6	12
NH	死刑	death penalty	2.32	6.98	5.53659	6.52	12
NH	罪犯	criminal	2.36	6.44	6.23333	19.56	18
NH	吵架	quarrel	2.39	6.32	6.1	13.85	16
NH	骨灰	body ash	2.82	6.32	6.95556	7.33	15
NH	妓女	prostitute	3.13	6.47	6.26667	1.63	10
NH	烧伤	burn	3.16	6.77	6.23333	12.22	16
NH	车祸	car crash	3.32	6.44	6.41111	3.26	15
NH	诈骗	scam	2.19	7.83	2.4	8.1489	19
NH	偏见	discriminatiobn	2.61	6.37	2.63333	9.7786	15
NH	侵犯	infringe	2.54	6.88	2.66667	27.7062	14
NH	灭亡	die out	2.28	7.28	2.83333	1.6298	8
NH	纠缠	harrass	2.61	6.64	3.13333	5.7042	18
NH	色情	porn	2.55	7.59	3.40909	3.2595	17
NH	淫秽	dirty	2.61	6.99	3.78049	4.8893	22
NH	贪婪	greedy	2.22	7.77	3.94444	3.2595	19
NH	猝死	sudden death	1.83	7.25	4.05556	0.8149	17
NH	怨恨	resentment	2.01	6.95	4.13889	8.1489	18
NH	出轨	love affair	2.08	7.78	4.2439		11
NH	耻辱	shame	2.27	7.12	4.25	6.5191	20
NH	沦陷	occupied	2.28	7.21	4.27273	0.8149	17
NH	背叛	betrayed	2.49	6.89	4.46341		18
NH	卑贱	dispicable	2.84	6.66	4.47222		17
PL	云彩	clouds	6.66013	5.97222	6	3.26	15
PL	风车	wind mill	6.68182	5.59091	6.27273		8
PL	喜鹊	magpie	6.44444	5.38889	6.44444	1.63	25
PL	桂花	osmanthus	6.81818	6.18182	6.5	0.81	17
PL	风筝	kite	6.74265	5.6585	6.54167	39.93	16
PL	熊猫	panda	6.51389	5.97304	6.57108	19.56	25
PL	贺卡	greeting cards	6.28571	5.71429	6.60714	0.81	14
PL	雪山	snow mountain	6.8	6.03333	6.7	8.15	14
PL	花束	bouquet	6.31707	6.04878	6.70732		14
PL	钢琴	piano	6.79984	6.11275	6.71324	20.37	21
PL	春联	spring couplets	6.27778	5.91444	6.72222	0.81	21
PL	田野	wild fields	6.63333	5.86	6.86667	13.85	16
PL	花卉	flowers	7.23333	5.83	6.93333	2.45	12
PL	蝴蝶	butterfly	7.05556	6.08333	7.83333	4.07	30
PL	海岸	coastline	6.32	6.04	5.68		18
PL	安然	comfortable	6.81818	5.09091	3.40909	1.63	18
PL	谦恭	humble	6.25	5.32143	4.15	0.81	22
PL	情调	atmosphere	6.31818	5.45455	4.27273	8.96	21
PL	乐观	optimistic	6.5	5.53571	4.03571	21.19	11
PL	自信	confidence	6.57143	5.57143	4.32143	23.63	15
PL	荣幸	honor	6.33333	5.58333	3.47222	3.26	17
PL	正气	integrity	6.82143	5.60714	3.5	22	9
PL	宁静	peaceful	6.26667	5.63333	3.66667	7.33	19
PL	舒畅	comfortable	6.60714	5.67857	4.28571	8.15	20
PL	知足	content	6.8	5.73333	3.6	10.59	15
PL	柔情	tenderness	6.54248	5.99755	4.6585	6.52	20
PL	圣洁	holy	6.72727	6.04545	3.27273	7.33	14
PL	真理	truth	6.40909	6.13636	3.19091	26.08	21
PL	吉祥	auspicious	6.75	6.17857	3.08571	12.22	16
PL	文明	civilization	6.60714	6.17857	4.46429	54.6	12
NL	摊贩	vendor	3.7561	4.46	6.65854	3.26	21
NL	苍蝇	flies	2.26	5.74	6.76879	11.41	21
NL	乌鸦	black crow	3.3	5.31	6.91667		13
NL	垃圾	garbbage	3.2	5.77	5.97304	30.15	14
NL	伤痕	scar	3.29	5.43	6.88333	4.07	17
NL	废墟	ruins	3.78	5.38	6.27778	6.52	22
NL	污垢	dirt	2.79	5.92	6.47222	1.63	15
NL	小偷	thief	2.23	5.85	6.53333	5.7	14
NL	泥泞	muddy	3.65	5.38	6.55556	4.89	16
NL	病房	ward	2.59	5.93	7.6	15.48	18
NL	伤口	scar	3.6	5.6	6.7	11.41	9
NL	匕首	dagger	2.7	6.22	6.73333	5.7	11
NL	枯草	dry weed	3.05556	4.61	7.03333		18
NL	罚单	ticket for traffic	2.84	4.94	6.94444		17
NL	惭愧	regretful	3.14134	5.69	4.48611	6.52	23
NL	流浪	rove	3.03333	5.63	3.5	3.26	20
NL	犹豫	hesitate	3.74428	5.93	4.2018	13.04	22
NL	呻吟	moan	3.48	5.24	3.36364	7.33	15
NL	自卑	low self-esteem	3.42	5.53	3.51552	7.33	14
NL	茫然	clueless	3.47	5.54	3.94363	8.96	21
NL	埋怨	complian	2.31	5.68	4.40909	13.04	19
NL	穷酸	poor and cheap	3.02	5.69	4.39788	0.81	21
NL	冗长	wordy	3.28	5.7	3.83333	1.63	8
NL	吝啬	stingy	2.64	5.71	3.78571	8.96	18
NL	彷徨	ramble	2.86	5.72	3.53571	4.07	19
NL	掩饰	cover up	2.86	5.75	3.67857	4.89	19
NL	失眠	insomnia	3.15	5.79	3.96429	2.44	15
NL	丑陋	ugly	3.21	5.99	4.14379	2.44	12
NL	虚弱	weak	2.6	6.22	3.7451	4.07	21
NL	枯燥	dull	2.73	6.28	2.93333	10.59	26
neu	铅笔	pencil	4.51389	3.84	7.14052	13.04	20
neu	羽毛	plume	5.4567	4.91667	6.14379	4.07	10
neu	骆驼	camel	4.53333	4.3	6.16667	4.07	17
neu	沙漠	desert	4.53333	3.7	6.3	35.04	20
neu	波浪	waves	5.68293	5.17073	6.34146	1.63	18
neu	番茄	tomato	5.05637	4.8848	7.34314	3.26	20
neu	地图	map	5.21951	5.19512	6.41463	17.11	14
neu	路灯	road light	5.14286	5	7.42857	6.52	19
neu	邮票	post stamp	4.70732	3.29	6.46341	2.44	18
neu	麻雀	sparrel	4.71487	4.058	6.59886	1.63	22
neu	池塘	pond	5.66667	4.80556	6.61111	2.44	19
neu	水稻	rice plant	5.13333	4.66667	6.63333	6.52	19
neu	轮船	ferry boad	5.2	4.83333	6.66667	8.15	19
neu	拱桥	arched bridge	5.44444	4.57778	6.75		19
neu	影子	shadow	4.78049	3.63	6.7561	17.11	18
neu	电脑	computer	5	4.76	7.86667	31.78	15
neu	足球	football	4.91667	4.17	7	97.79	18
neu	核桃	walnuts	5.14634	4.59	7.04878	6.52	20
neu	楼房	building	4.33333	3.81	7.23333	36.67	21
neu	花瓶	vase	5.21951	5.09756	7.39024		17
neu	规矩	rules	4.66667	3.51	2.56667	37.48	17
neu	平常	common	4.46667	4.22	2.8	24.45	16
neu	传统	tradition	4.4	3.73	3.06667	143.42	15
neu	过程	process	4.77778	3.81	3.08333	209.43	18
neu	见解	viewpoints	4.36667	3.72	3.23333	17.11	17
neu	思考	think	4.35714	3.87	3.32143	0.81	15
neu	条理	organization	4.60714	3.97	3.35714	0.81	18
neu	生命	life	5.16667	6.16667	3.36111	136.9	13
neu	真实	real	5.53571	5.85714	3.5	44	18
neu	命运	destimy	4.31373	3.71	3.60131	70.9	15
neu	知识	knowledge	5.2355	5.25572	3.65523	59.71	15
neu	年华	years	5.17857	4.49286	3.71	41.56	12
neu	法规	regulations	4.53333	4.97	3.73333	100.23	16
neu	依旧	as usual	4.34232	3.91	3.83007	0.81	13
neu	生活	life	5.16667	5.03333	3.83333	122.23	14
neu	思维	logic	5.14286	4.03571	3.89286	35.04	20
neu	规律	regularity	5.07317	4.90244	3.95122	66.31	17
neu	时代	times	4.5	3.95	3.95455	26.43	12
neu	风俗	ritual	4.78571	4.57	4.17857	13.04	13
neu	微妙	subtle	4.95122	4.71	4.4878	4.07	20
